# Supplementary material for: A novel off–on fluorescent probe for sensitive imaging of mitochondria-specific nitroreductase activity in living tumor cells
Source: Royal Society of Chemistry journal article supplement (doi:10.1039/c7ob00781g), 2017-01-01
Supplement: c7ob00781g1.pdf [file c7ob00781g1.pdf]

**Electronic supplementary information (ESI) for**

**A novel off-on fluorescent probe for sensitive imaging of mitochondria-specific nitroreductase activity in living tumor cells**

Bo Huang, Wen Chen, Yong-Qing Kuang, Wei Liu, Xian-Jun Liu, Li-Juan Tang\*,  
Jian-Hui Jiang\*

State Key Laboratory of Chemo/Biosensing and Chemometrics, College of Chemistry  
and Chemical Engineering, College of Biology, Hunan University, Changsha, Hunan  
410082, P. R. China

Corresponding authors:

\*E-mail: tanglijuan@hnu.edu.cn

\*E-mail: jianhuijiang@hnu.edu.cn

Fax: +86-731-88821916

## 1. Synthetic procedures

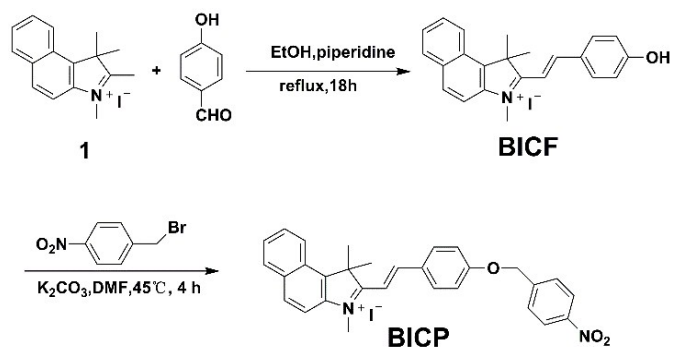

**Scheme S1.** Synthetic procedure of the BICP.

## 2. $^1\text{H}$ NMR, $^{13}\text{C}$ NMR and mass spectrometry (MS)

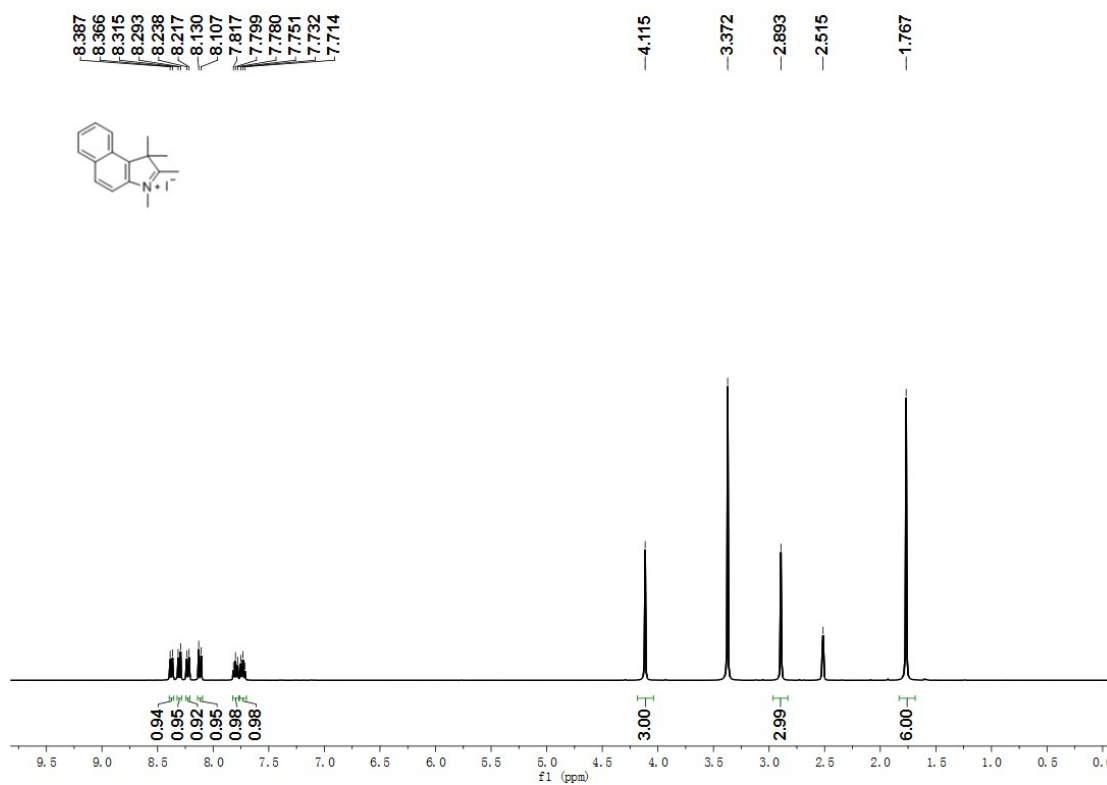

**Fig. S1.**  $^1\text{H}$ -NMR spectra of Compound 1 in DMSO- $\text{d}_6$ .

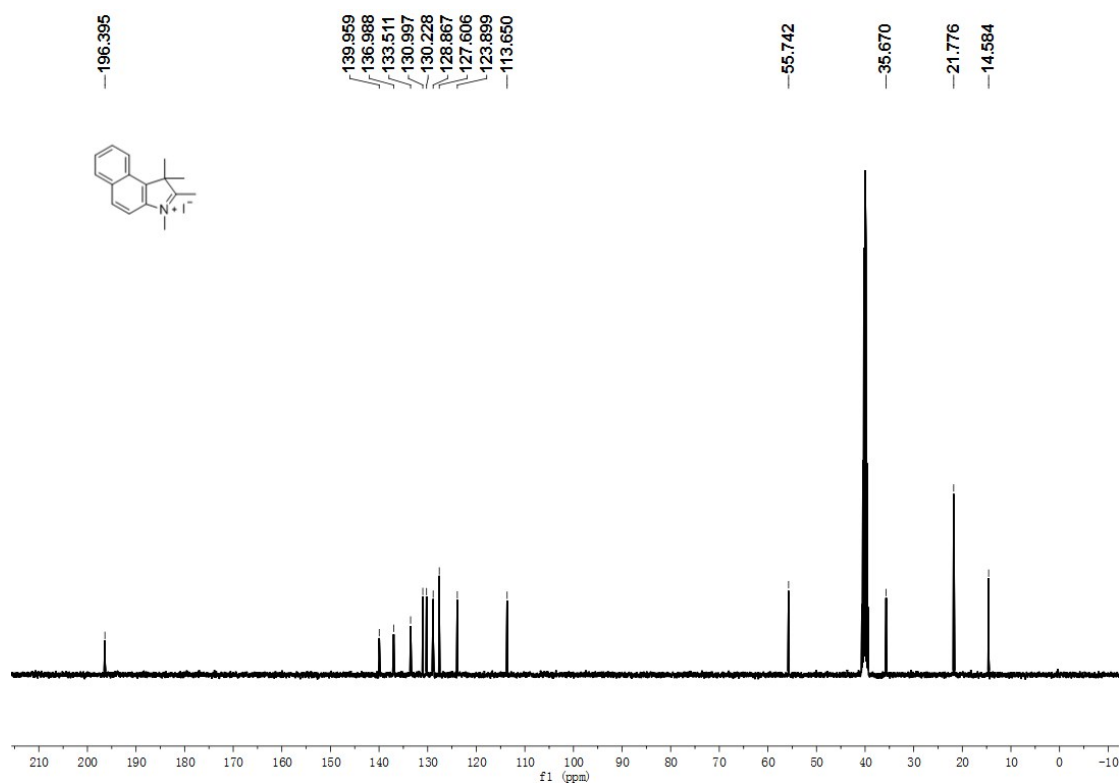

**Fig. S2.** <sup>13</sup>C-NMR spectra of Compound 1 in DMSO-d<sub>6</sub>.

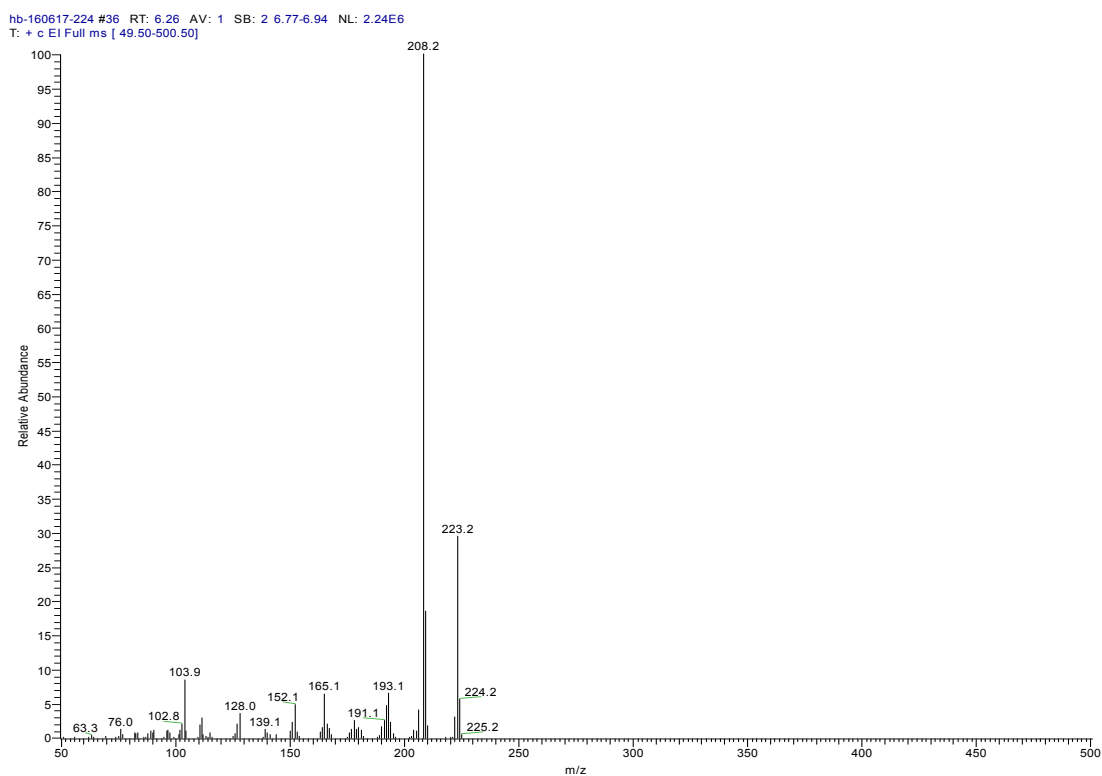

**Fig. S3.** MS (EI) spectra of Compound 1 in methanol.

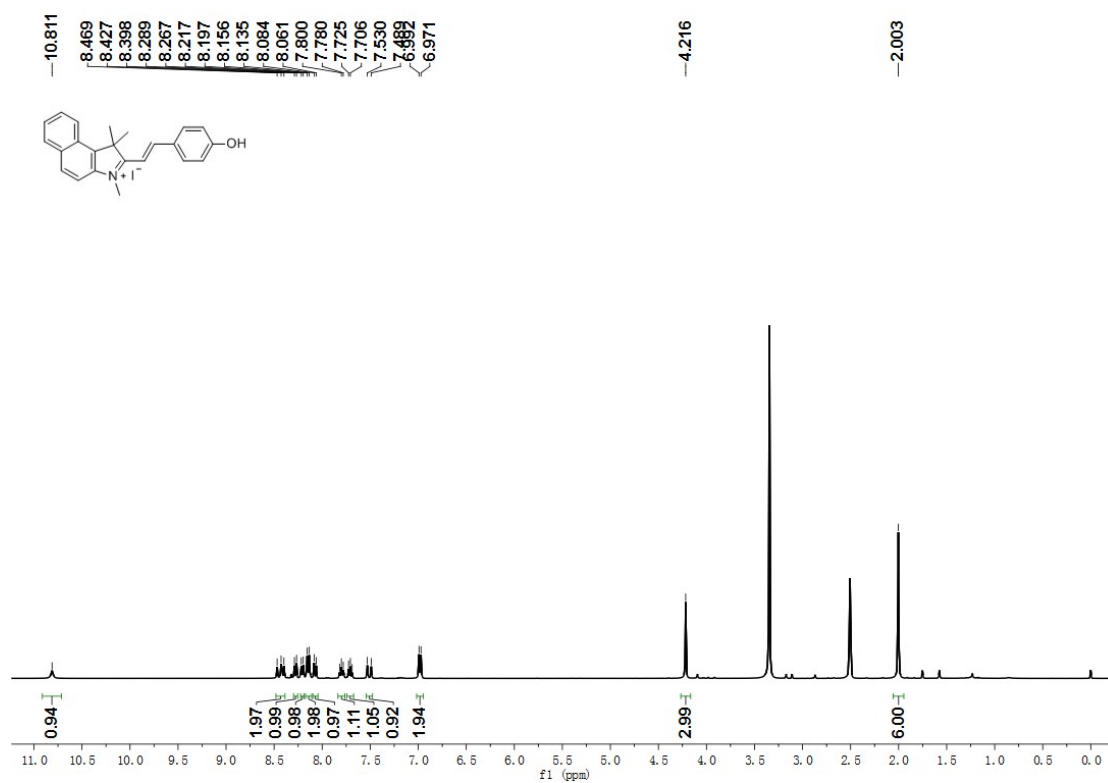

**Fig. S4.** <sup>1</sup>H-NMR spectra of BICF in DMSO-d<sub>6</sub>

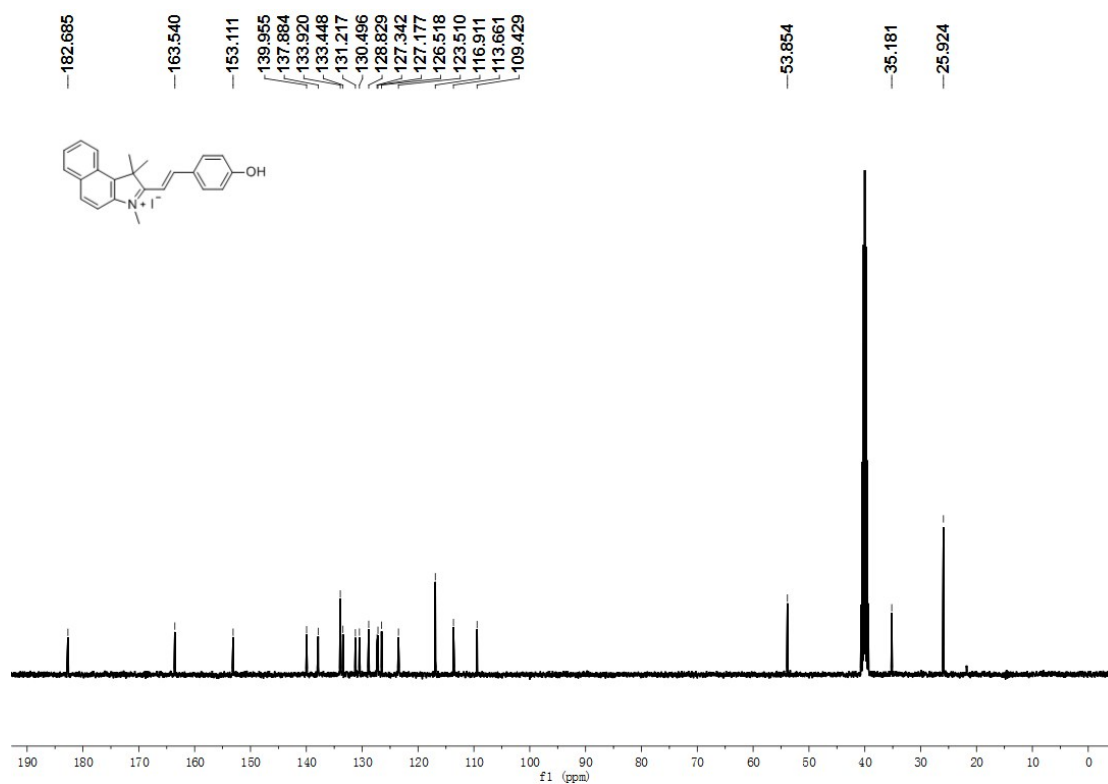

**Fig. S5.** <sup>13</sup>C-NMR spectra of BICF in DMSO-d<sub>6</sub>.

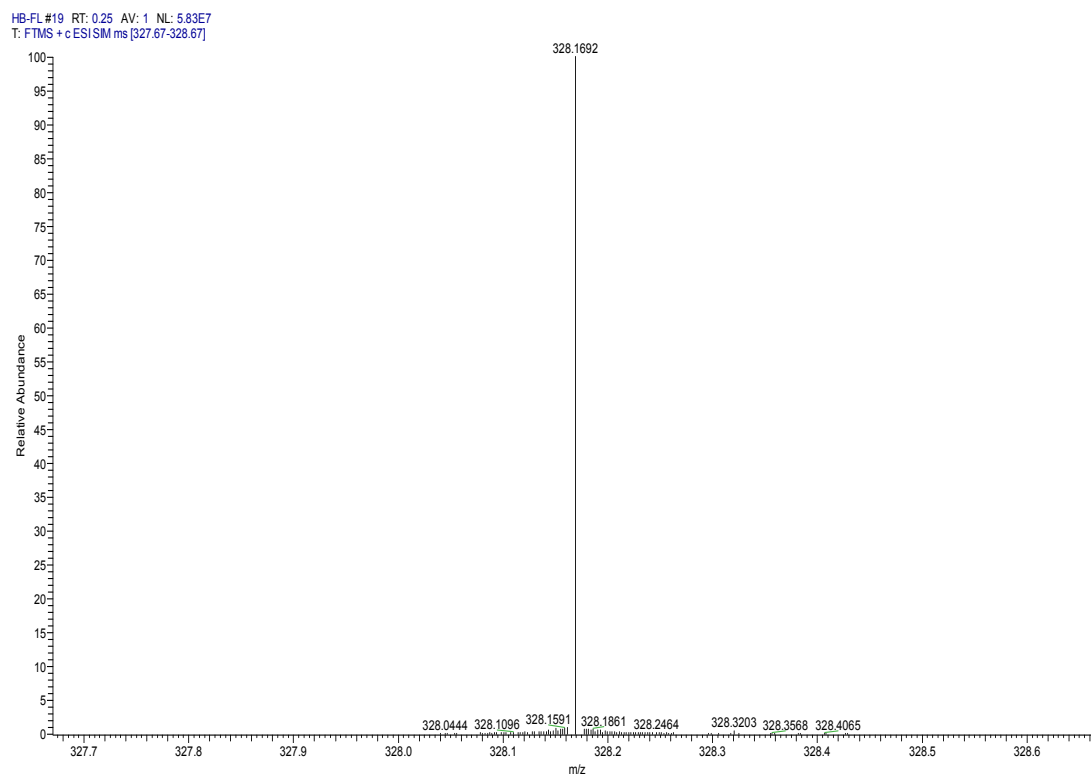

**Fig. S6.** HRMS (ESI) spectra of BICF in methanol.

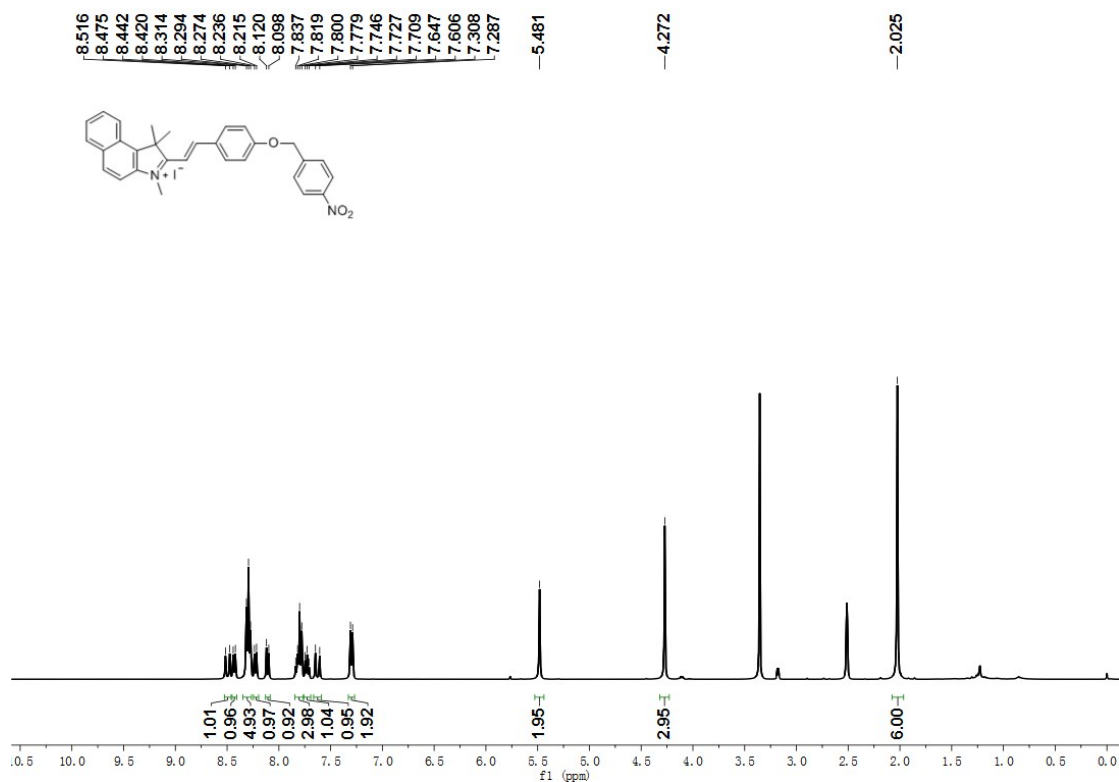

**Fig. S7.**  $^1\text{H}$ -NMR spectra of BICP in  $\text{DMSO-d}_6$ .

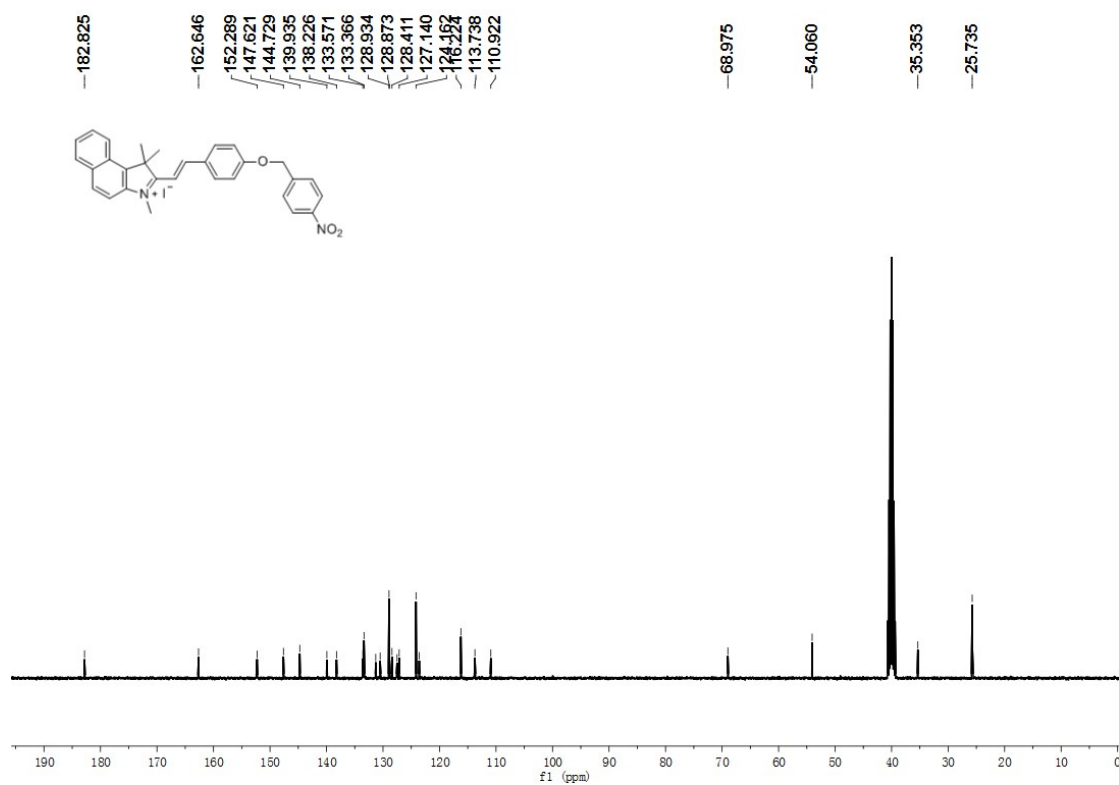

**Fig. S8.** <sup>13</sup>C-NMR spectra of BICP in DMSO-d<sub>6</sub>.

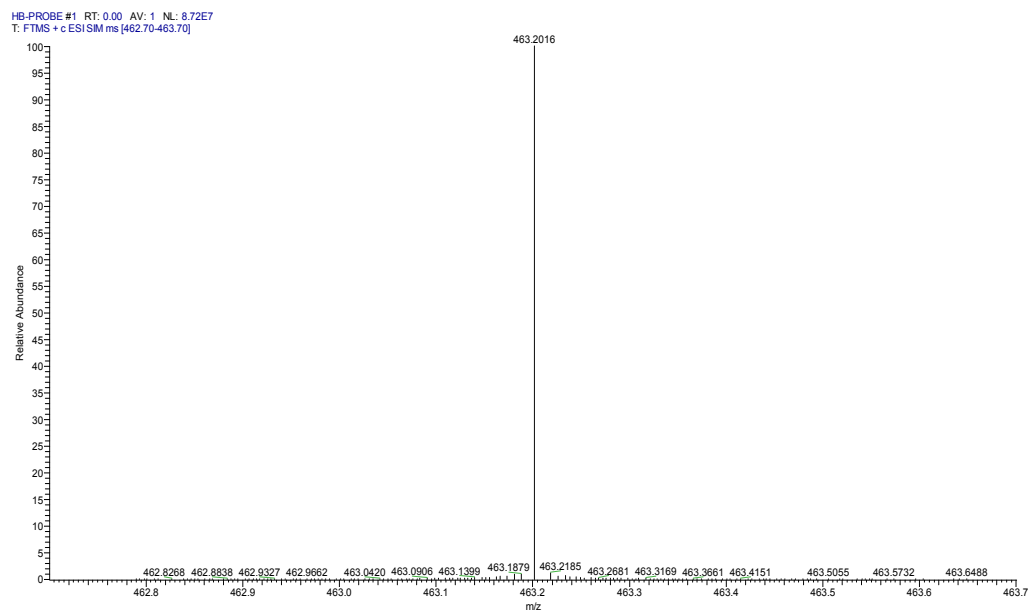

**Fig. S9.** HRMS (ESI) spectra of BICP in methanol.

### 3. UV spectroscopic data

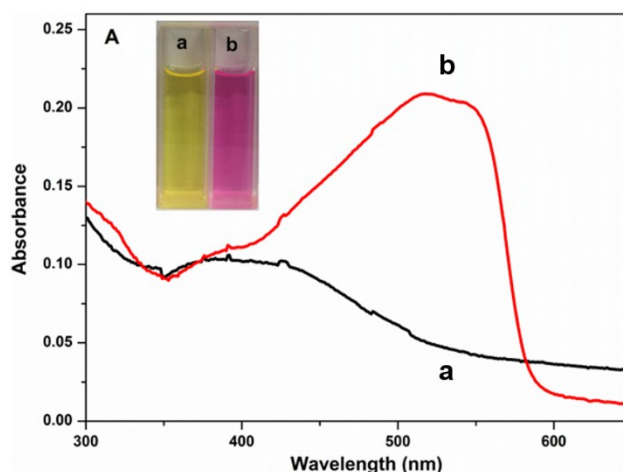

**Fig. S10.** Absorption spectra of BICP (10  $\mu\text{M}$ ) (a) before and (b) after reaction with NTR (5  $\mu\text{g mL}^{-1}$ ), in the presence of 500  $\mu\text{M}$  NADH in 10 mM PBS (pH 7.4, containing 5% DMSO) at 37  $^{\circ}\text{C}$  for 30 min. Inset: the color changes of BICP in the absence or presence of NTR.

### 4. Photograph for the assay of selectivity

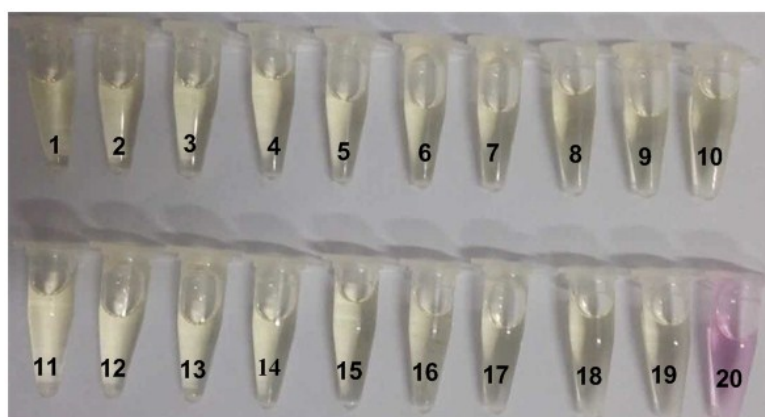

**Fig. S11.** Photograph for the assay of selectivity. Color changes of BICP (10  $\mu\text{M}$ ) in the presence of NADH (500  $\mu\text{M}$ ) to various species: (1) control, (2) glutathione (GSH, 5 mM), (3) cysteine (Cys, 1 mM), (4) homocysteine (Hcy, 1mM), (5) NaClO (10  $\mu\text{M}$ ), (6) dithiothreitol (DTT, 1 mM), (7) KCl (50 mM), (8) NaCl (10 mM), (9)  $\text{MgCl}_2$  (2.5 mM), (10)  $\text{CaCl}_2$  (2.5 mM), (11) NaHS (10  $\mu\text{M}$ ), (12) glycine (Gly, 1 mM), (13) tryptophan (Try, 1 mM), (14) vitamin C (1 mM), (15)  $\text{Na}_2\text{SO}_3$  (10 mM), (16)  $\text{H}_2\text{O}_2$  (1 mM), (17) tyrosine (Tyr, 1 mM), (18) glucose (10 mM), (19) arginine (Arg, 1 mM), and (20) NTR (5  $\mu\text{g mL}^{-1}$ ).

## 5. Real-time fluorescence records and kinetic parameters

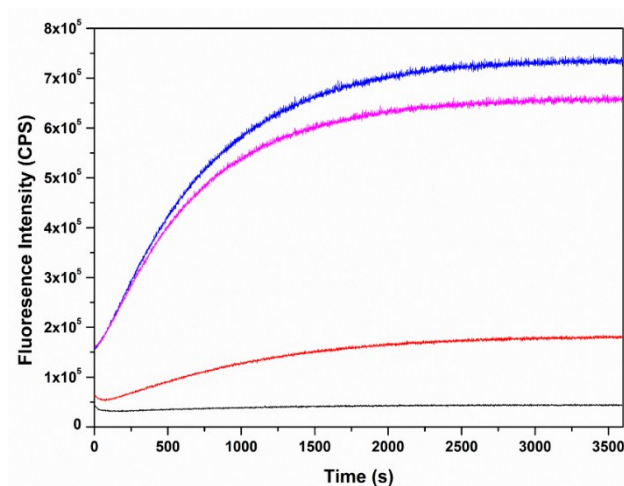

**Fig. S12.** A plot of fluorescence intensity of BICP (10  $\mu\text{M}$ ) vs. the reaction time in the presence of varied concentrations of NTR (from bottom to top): 0 (control, black line), 0.25  $\mu\text{g mL}^{-1}$  (red line), 5  $\mu\text{g mL}^{-1}$  (pink line) and 10  $\mu\text{g mL}^{-1}$  (blue line). The measurements were performed at 25  $^{\circ}\text{C}$  in 10 mM PBS (pH 7.4) with  $\lambda_{\text{ex/em}} = 523/570$  nm.

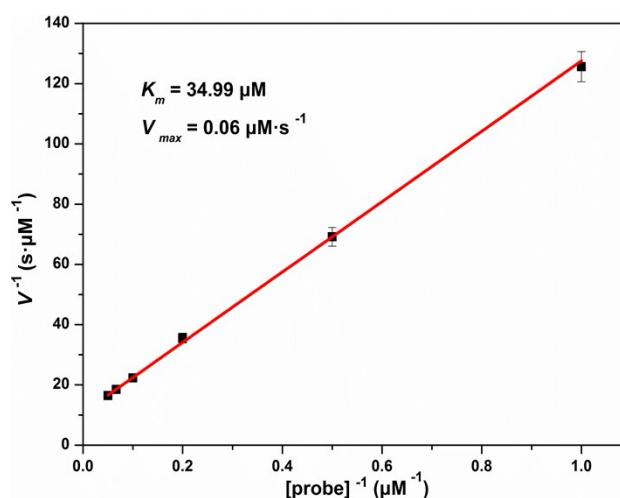

**Fig. S13.** Lineweaver-Burk double reciprocal plot for the enzyme-catalyzed reaction. The Michaelis-Menten equation was described as:  $V = V_{\text{max}}[\text{probe}] / (K_m + [\text{probe}])$ , where  $V$  is the reaction rate,  $[\text{probe}]$  is BICP concentration (substrate), and  $K_m$  is the Michaelis constant. Conditions: 3  $\mu\text{g mL}^{-1}$  NTR, 1-20  $\mu\text{M}$  BICP probe. All measurements were performed at 37  $^{\circ}\text{C}$ ,  $\lambda_{\text{ex/em}} = 523/570$  nm. Reaction at each probe concentration was repeated three times, and the error bars represent standard deviations. Points were fitted using a linear regression model (correlation coefficient  $R^2 = 0.9992$ ).



## 6. Mechanism research

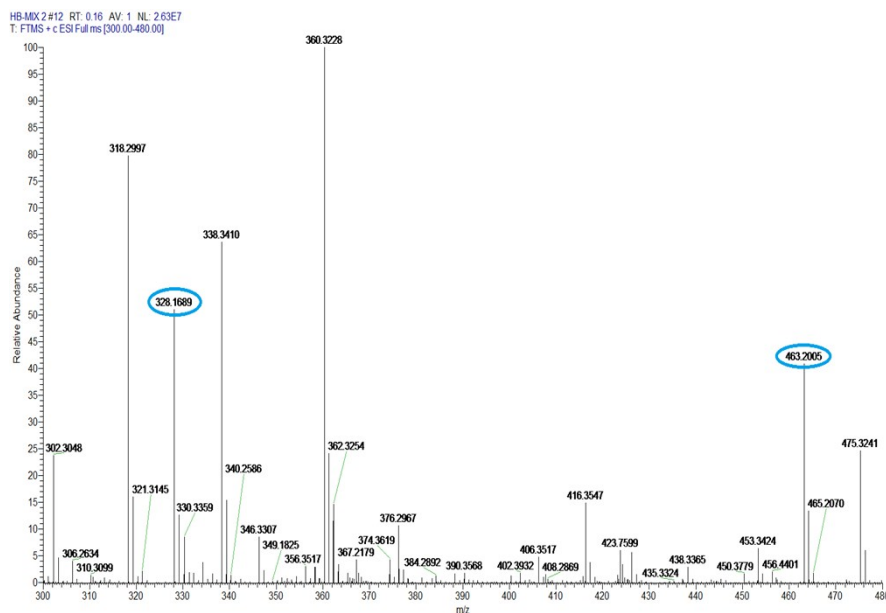

**Fig. S14.** HRMS (ESI) spectra of the reaction solution of BICP (100  $\mu\text{M}$ ) with NTR (1  $\mu\text{g mL}^{-1}$ ).

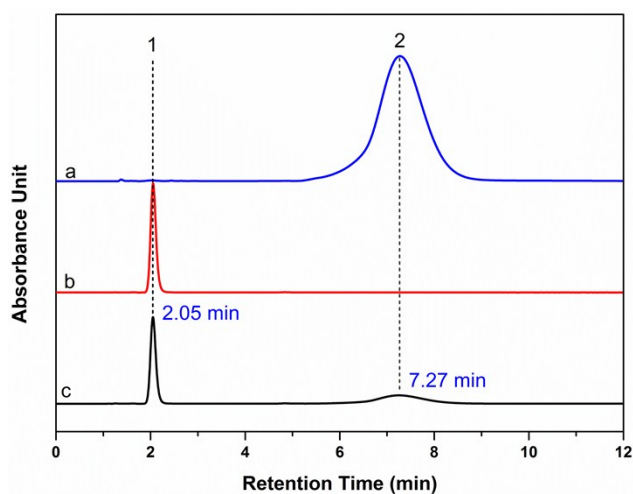

**Fig. S15.** Chromatograms of different reaction systems. (a) 100  $\mu\text{M}$  BICP; (b) 100  $\mu\text{M}$  BICF; (c) the reaction products of 100  $\mu\text{M}$  BICP with 1  $\mu\text{g mL}^{-1}$  NTR in the presence of 500  $\mu\text{M}$  NADH. The assignments of the peaks: (1) 2.05 min, BICF; (2) 7.27 min, BICP. Detection: UV-vis (440 nm) detector. Mobile phase: methanol-water = 90:10 (v/v). Flow rate: 1 mL/min; T: 31  $^{\circ}\text{C}$ .

## 7. Effects of pH and temperature

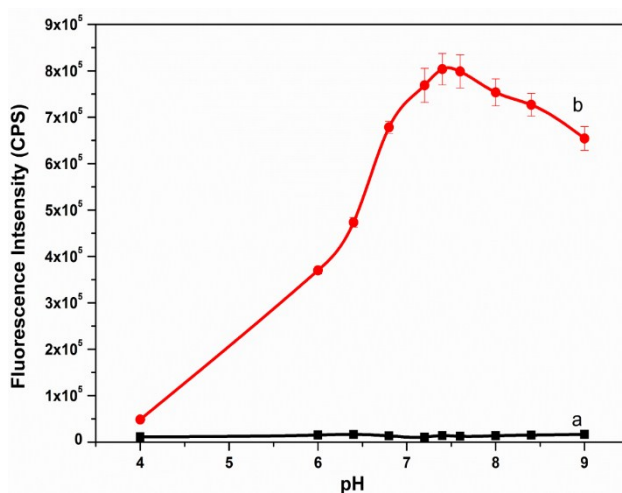

**Fig. S16.** Effect of pH on the fluorescence intensity of 10  $\mu\text{M}$  BICP (a) before and (b) after reaction with 5  $\mu\text{g mL}^{-1}$  NTR at 37  $^{\circ}\text{C}$ . Reaction at each pH value was repeated three times, and the error bars represent standard deviations.  $\lambda_{\text{ex/em}} = 523/570$  nm.

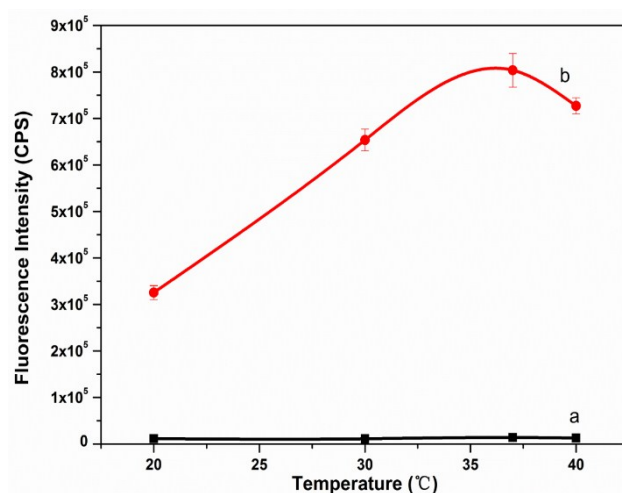

**Fig. S17.** Effect of temperature on the fluorescence intensity of 10  $\mu\text{M}$  BICP (a) before and (b) after reaction with 5  $\mu\text{g mL}^{-1}$  NTR. Reaction at each temperature was repeated three times, and the error bars represent standard deviations.  $\lambda_{\text{ex/em}} = 523/570$  nm.

## 8. Cell toxicity of BICP

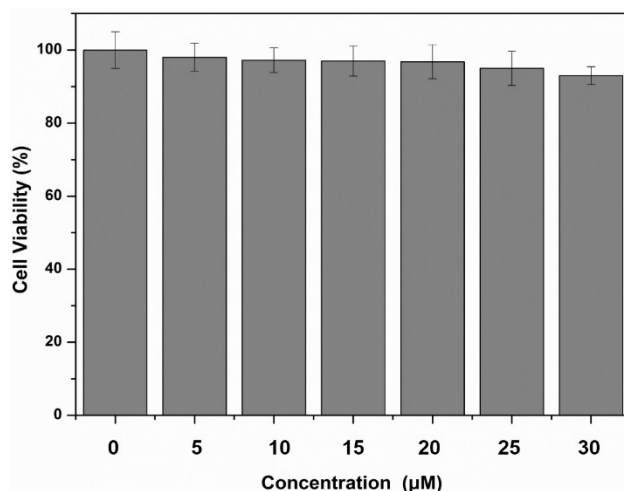

**Fig. S18.** Cell viabilities (%) estimated by MTT proliferation tests versus incubation concentrations of BICP. HeLa cells were incubated with 0-30  $\mu\text{M}$  BICP at 37  $^{\circ}\text{C}$  for 24 h. The viability of the cells without BICP is defined as 100%.

## 9. Effects of dicoumarin on hypoxia-induced NTR in living cells

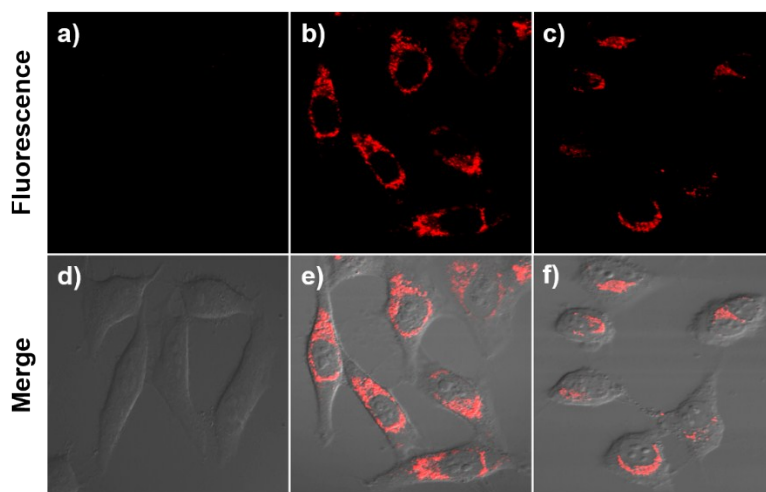

**Fig. S19.** Confocal fluorescence images of HeLa cells under the hypoxic condition of 1%  $\text{O}_2$  for 4 h ( $\lambda_{\text{ex}} = 559 \text{ nm}$ ,  $\lambda_{\text{em}} = 565\text{-}600 \text{ nm}$ ). (a) HeLa cells only; (b) Cells were incubated with 10  $\mu\text{M}$  BICP for 30 min; (c) Cells were incubated with 0.1 mM dicoumarin and 10  $\mu\text{M}$  BICP for 30 min. (d-f) The merged fluorescence imaging and corresponding differential interference contrast (DIC) images.

## 10. Colocalization assays

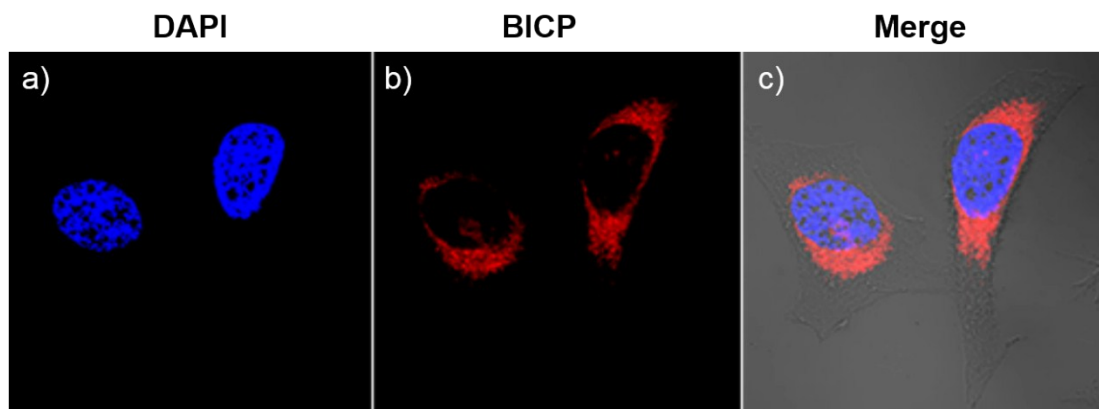

**Fig. S20.** Co-localization of BICP and DAPI in HeLa cells. (a) Fluorescence image of DAPI ( $\lambda_{\text{ex}} = 405 \text{ nm}$ ,  $\lambda_{\text{em}} = 440\text{-}480 \text{ nm}$ ). (b) Fluorescence image of BICP ( $\lambda_{\text{ex}} = 559 \text{ nm}$ ,  $\lambda_{\text{em}} = 565\text{-}600 \text{ nm}$ ). (c) Merged image of images a, b and differential interference contrast (DIC) images.

## 11. Flow cytometric assay

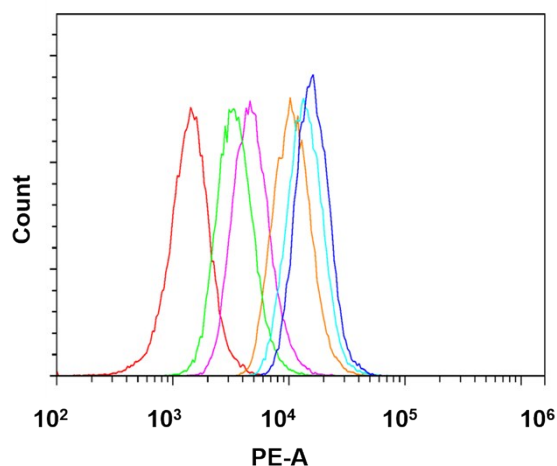

**Fig. S21.** Flow cytometric assay for HeLa cells. Red curve: HeLa cells only; Green curve: HeLa cells were treated with  $10 \mu\text{M}$  BICP for 30 min at  $37^\circ\text{C}$  and then kept under normoxic ( $20\% \text{O}_2$ ) conditions for 4 h.; Pink curve: HeLa cells were treated with  $10 \mu\text{M}$  BICP for 30 min at  $37^\circ\text{C}$  and then kept under  $15\% \text{O}_2$  conditions for 4 h.; Orange curve: HeLa cells were treated with  $10 \mu\text{M}$  BICP for 30 min at  $37^\circ\text{C}$  and then kept under hypoxic conditions  $10\% \text{O}_2$  for 4 h.; Light blue curve: HeLa cells were treated with  $10 \mu\text{M}$  BICP for 30 min at  $37^\circ\text{C}$  and then kept under  $5\% \text{O}_2$  for 4 h.; Dark blue curve: HeLa cells were treated with  $10 \mu\text{M}$  BICP for 30 min at  $37^\circ\text{C}$  and then kept under hypoxic conditions  $1\% \text{O}_2$  for 4 h.
